# Supplementary material
Source: publisher figshare collection journal article supplement (https://sage.figshare.com/ndownloader/files/17985710)
Supplement: Supplementary file 1 [file 17985710]

## **Appendix for “Roles, Identity, and Security: Foreign Policy Contestation in Monarchical Kuwait”**

### **Overview of Qualitative Data Collected**

Three types of qualitative data were collected for this article: 1) historical information taken from published English and Arabic-language works; 2) contemporary Arabic-language media and documentation in Kuwait, taken from newspapers, broadcast programs, and political events; and 3) personal interviews with Kuwaiti informants.

The first two categories of data are referenced in the article through complete citations. Regarding the latter, a total of 19 semi-structured interviews were undertaken in three overseas research engagements: August 2016 (in Kuwait), February 2017 (in Kuwait), and September 2018 (in London). The former two represented focused fieldwork undertaken for this project, while the third was conducted on the margins of a longer legal conference in which Kuwaiti interlocutors were present. Initial contact was made via e-mail or mobile phone (including the encrypted chat program WhatsApp), followed by personal meetings. All interviews were conducted personally in Arabic or English. All interviewees were given the presumption of confidentiality, with identification markers (such as occupations, institutions, or names) provided only with explicit permission.

The interviewees were selected through snowball sampling, supplemented by guidance from local colleagues, with each interviewee queried upon the conclusion of each meeting for recommendations for other knowledgeable individuals. The possibility that such non-random selection techniques would result in bias was mitigated by identifying multiple categories of sources (i.e., princes, parliamentarians, officials, activists, journalists), as well as by triangulating statements from these sources with corollary data from historical analysis, Arabic-language media, and personal observations.

Of the 19 total interviews conducted, ten were referenced in the article. Others either did not contain enough relevant data, or else were redundant in terms of furnishing data already given in the ten cited interviews. The following lists these interviews by date, location, name (if voluntarily provided), source category, and length of time.

| <i>Date</i>              | <i>Location</i> | <i>Name</i>                                      | <i>Occupation</i>                                | <i>Length</i>     |
|--------------------------|-----------------|--------------------------------------------------|--------------------------------------------------|-------------------|
| <b>6 August 2016</b>     | <b>Kuwait</b>   | <b>Confidential</b>                              | <b>Youth activist (blogger)</b>                  | <b>45 minutes</b> |
| <b>12 August 2016</b>    | <b>Kuwait</b>   | <b>Confidential</b>                              | <b>NGO worker (Observatory for Human Rights)</b> | <b>45 minutes</b> |
| 13 August 2016           | Kuwait          | Confidential                                     | Academic                                         | 30 minutes        |
| 14 August 2016           | Kuwait          | Confidential                                     | Lawyer                                           | 60 minutes        |
| 15 August 2016           | Kuwait          | Confidential                                     | Businessperson                                   | 45 minutes        |
| <b>12 February 2017</b>  | <b>Kuwait</b>   | <b>Muhammad Rumaihi</b>                          | <b>Academic</b>                                  | <b>75 minutes</b> |
| <b>13 February 2017</b>  | <b>Kuwait</b>   | <b>Ambassador Abdulaziz Al-Sharekh</b>           | <b>Official (Ministry of Foreign Affairs)</b>    | <b>90 minutes</b> |
| 13 February 2017         | Kuwait          | Confidential                                     | Academic                                         | 45 minutes        |
| <b>15 February 2017</b>  | <b>Kuwait</b>   | <b>HRH Sheikh Nasser Sabah Al-Ahmad Al-Sabah</b> | <b>Royal prince / official (Prime Ministry)</b>  | <b>60 minutes</b> |
| 15 February 2017         | Kuwait          | Abdulla Al-Shayji                                | Academic                                         | 45 minutes        |
| <b>16 February 2017</b>  | <b>Kuwait</b>   | <b>Hanan Al-Hajeri</b>                           | <b>Academic</b>                                  | <b>60 minutes</b> |
| <b>19 February 2017</b>  | <b>Kuwait</b>   | <b>Confidential</b>                              | <b>Official (Member of Parliament)</b>           | <b>60 minutes</b> |
| 21 February 2017         | Kuwait          | Confidential                                     | Youth activist                                   | 45 minutes        |
| 25 February 2017         | Kuwait          | Confidential                                     | Journalist                                       | 45 minutes        |
| <b>26 February 2017</b>  | <b>Kuwait</b>   | <b>Confidential</b>                              | <b>Official (Ministry of Foreign Affairs)</b>    | <b>60 minutes</b> |
| <b>8 September 2018</b>  | <b>London</b>   | <b>Confidential</b>                              | <b>Youth activist</b>                            | <b>45 minutes</b> |
| 9 September 2018         | London          | Confidential                                     | Journalist                                       | 30 minutes        |
| 10 September 2018        | London          | HRH Sheikh Khalifa Ali Al-Khalifa Al-Sabah       | Royal prince / businessperson                    | 30 minutes        |
| <b>12 September 2018</b> | <b>London</b>   | <b>Confidential</b>                              | <b>Journalist</b>                                | <b>60 minutes</b> |

**\*\* Bold denotes cited interview in article.**
